# Supplementary material for: Unprecedented cyclic [Mo6O19]2−cluster and five organic–inorganic hybrids based on polyoxomolybdates and 4-amino-3,5-bis(pyridyl)-1,2,4-triazole
Source: Royal Society of Chemistry journal article supplement (doi:10.1039/c002063j), 2010-12-02
Supplement: c002063j.pdf [file c002063j.pdf]

## Supporting Information

### Unprecedented cyclic $[\text{Mo}_6\text{O}_{19}]^{2-}$ cluster and five organic-inorganic hybrid complexes based on polyoxomolybdates and 4-amino-3,5-bis(pyridyl)-1,2,4-triazole

Ming-Xing Li<sup>a,c,\*</sup>, Hui-Ling Chen<sup>a</sup>, Jin-Peng Geng<sup>a</sup>, Xiang He<sup>a</sup>, Min Shao<sup>b</sup>, Shou-Rong Zhu<sup>a</sup>, Zhao-Xi Wang<sup>a,\*</sup>

<sup>a</sup> Department of Chemistry, College of Science, Shanghai University, Shanghai 200444, China

<sup>b</sup> Instrumental Analysis and Research Center, Shanghai University, Shanghai 200444, China

<sup>c</sup> State Key Laboratory of Coordination Chemistry, Nanjing University, Nanjing 210093, China

\* Corresponding author. E-mail: mx\_li@mail.shu.edu.cn, zxwang@shu.edu.cn

Table S1. Crystallographic data and structural refinements for 1–5

| Complex                                                                              | 1                                                                                | 2                                                                               | 3                                                                                | 4                                                                 | 5                                                                                 |
|--------------------------------------------------------------------------------------|----------------------------------------------------------------------------------|---------------------------------------------------------------------------------|----------------------------------------------------------------------------------|-------------------------------------------------------------------|-----------------------------------------------------------------------------------|
| Formula                                                                              | C <sub>12</sub> H <sub>14</sub> CuMo <sub>4</sub> N <sub>6</sub> O <sub>15</sub> | C <sub>24</sub> H <sub>24</sub> Mo <sub>8</sub> N <sub>12</sub> O <sub>26</sub> | C <sub>12</sub> H <sub>12</sub> CuMo <sub>4</sub> N <sub>6</sub> O <sub>14</sub> | C <sub>12</sub> H <sub>12</sub> CuMoN <sub>6</sub> O <sub>5</sub> | C <sub>24</sub> H <sub>28</sub> CoMo <sub>6</sub> N <sub>12</sub> O <sub>23</sub> |
| Formula weight                                                                       | 929.59                                                                           | 1664.07                                                                         | 911.58                                                                           | 479.76                                                            | 1487.15                                                                           |
| Crystal system                                                                       | Triclinic                                                                        | Monoclinic                                                                      | Monoclinic                                                                       | Monoclinic                                                        | Triclinic                                                                         |
| Space group                                                                          | <i>P</i> $\bar{1}$                                                               | <i>P</i> 2 <sub>1</sub> / <i>c</i>                                              | <i>P</i> 2 <sub>1</sub> / <i>c</i>                                               | <i>P</i> 2 <sub>1</sub> / <i>c</i>                                | <i>P</i> $\bar{1}$                                                                |
| <i>a</i> (Å)                                                                         | 9.689(2)                                                                         | 10.626(1)                                                                       | 7.6630(4)                                                                        | 10.9052(6)                                                        | 9.5193(8)                                                                         |
| <i>b</i> (Å)                                                                         | 9.847(2)                                                                         | 15.821(1)                                                                       | 29.474(2)                                                                        | 17.603(1)                                                         | 10.9534(9)                                                                        |
| <i>c</i> (Å)                                                                         | 13.533(2)                                                                        | 12.852(1)                                                                       | 9.7421(6)                                                                        | 7.8921(4)                                                         | 11.4935(9)                                                                        |
| $\alpha$ (°)                                                                         | 99.395(2)                                                                        | 90                                                                              | 90                                                                               | 90                                                                | 91.786(1)                                                                         |
| $\beta$ (°)                                                                          | 109.368(2)                                                                       | 100.703(1)                                                                      | 101.823(1)                                                                       | 92.640(2)                                                         | 113.800(1)                                                                        |
| $\gamma$ (°)                                                                         | 101.945(2)                                                                       | 90                                                                              | 90                                                                               | 90                                                                | 105.469(1)                                                                        |
| <i>V</i> (Å <sup>3</sup> )                                                           | 1153.6(3)                                                                        | 2123.1(2)                                                                       | 2153.7(2)                                                                        | 1513.39(14)                                                       | 1043.60(15)                                                                       |
| <i>Z</i>                                                                             | 2                                                                                | 2                                                                               | 4                                                                                | 4                                                                 | 1                                                                                 |
| <i>D</i> <sub>c</sub> (g cm <sup>-3</sup> )                                          | 2.676                                                                            | 2.603                                                                           | 2.811                                                                            | 2.106                                                             | 2.366                                                                             |
| <i>F</i> (000)                                                                       | 890                                                                              | 1592                                                                            | 1740                                                                             | 948                                                               | 719                                                                               |
| $\mu$ (mm <sup>-1</sup> )                                                            | 3.109                                                                            | 2.390                                                                           | 3.324                                                                            | 2.275                                                             | 2.231                                                                             |
| Reflections collected                                                                | 5993                                                                             | 10770                                                                           | 11121                                                                            | 8029                                                              | 5378                                                                              |
| Unique reflections                                                                   | 4012                                                                             | 3753                                                                            | 3804                                                                             | 2670                                                              | 3617                                                                              |
| <i>R</i> <sub>int</sub>                                                              | 0.0193                                                                           | 0.0190                                                                          | 0.0177                                                                           | 0.0640                                                            | 0.0147                                                                            |
| GOF                                                                                  | 1.061                                                                            | 1.079                                                                           | 1.099                                                                            | 1.054                                                             | 1.103                                                                             |
| <i>R</i> <sub>1</sub> , <i>wR</i> <sub>2</sub> [ <i>I</i> > 2 $\sigma$ ( <i>I</i> )] | 0.0350, 0.0996                                                                   | 0.0240, 0.0592                                                                  | 0.0210, 0.0482                                                                   | 0.0448, 0.0912                                                    | 0.0264, 0.0702                                                                    |
| <i>R</i> <sub>1</sub> , <i>wR</i> <sub>2</sub> (all data)                            | 0.0387, 0.1040                                                                   | 0.0270, 0.0608                                                                  | 0.0231, 0.0490                                                                   | 0.0713, 0.1045                                                    | 0.0277, 0.0710                                                                    |

Table S2. Selected bond distances (Å) and angles (°) for 1–5

|                     |            |                         |            |
|---------------------|------------|-------------------------|------------|
|                     |            | <b>1</b> <sup>[a]</sup> |            |
| Cu(1)-N(1)          | 1.964(4)   | Cu(1)-N(2)#2            | 2.029(4)   |
| Cu(1)-N(3)#1        | 1.959(4)   | Cu-O(12)                | 2.507(4)   |
| Mo(1)-O(2)          | 2.009(4)   | Mo(2)-O(2)#3            | 1.805(4)   |
| N(3)#1-Cu(1)-N(1)   | 127.61(17) | N(1)-Cu(1)-N(2)#2       | 115.78(17) |
| N(3)#1-Cu(1)-N(2)#2 | 115.57(16) | N(1)-Cu(1)-O(12)        | 99.68(2)   |
|                     |            | <b>2</b> <sup>[b]</sup> |            |
| Mo(1)-O(1)          | 1.695(3)   | Mo(3)-O(7)              | 1.696(3)   |
| Mo(1)-O(2)          | 1.956(2)   | Mo(3)-O(6)              | 1.698(3)   |
| Mo(1)-O(3)          | 1.736(3)   | Mo(3)-O(5)              | 1.885(3)   |
| Mo(1)-O(4)          | 1.953(2)   | Mo(3)-O(2)#1            | 1.999(2)   |
| Mo(1)-O(11)         | 2.171(2)   | Mo(3)-O(4)              | 2.336(2)   |
| Mo(1)-O(11)#1       | 2.359(2)   | Mo(3)-O(11)#1           | 2.361(2)   |
| Mo(2)-O(8)          | 1.691(3)   | Mo(4)-O(12)             | 1.696(3)   |
| Mo(2)-O(9)          | 1.705(3)   | Mo(4)-O(13)             | 1.704(3)   |
| Mo(2)-O(10)         | 1.904(3)   | Mo(4)-O(10)             | 1.902(3)   |
| Mo(2)-O(4)          | 1.985(2)   | Mo(4)-O(5)#1            | 1.927(3)   |
| Mo(2)-O(11)         | 2.312(2)   | Mo(4)-O(3)#1            | 2.327(3)   |
| Mo(2)-O(2)#1        | 2.341(2)   | Mo(4)-O(11)             | 2.394(2)   |
|                     |            | <b>3</b> <sup>[c]</sup> |            |
| Cu(1)-N(1)          | 1.982(3)   | Cu(1)-O(10)             | 1.981(2)   |
| Cu(1)-N(6)#2        | 2.004(3)   | Cu(1)-O(14)             | 1.924(2)   |
| Cu(1)-O(12)         | 2.519(2)   |                         |            |
| O(10)-Cu(1)-N(1)    | 84.39(11)  | O(14)-Cu(1)-N(6)#2      | 91.25(11)  |
| O(14)-Cu(1)-O(4)    | 92.21(10)  | N(1)-Cu(1)-N(6)#2       | 93.83(12)  |
| O(14)-Cu(1)-N(1)    | 171.00(12) | O(10)-Cu(1)-N(6)#2      | 167.52(11) |
|                     |            | <b>4</b> <sup>[d]</sup> |            |
| Cu(1)-O(1)          | 1.964(5)   | Mo(1)-O(2)              | 1.738(4)   |
| Cu(1)-O(2)          | 2.163(4)   | Mo(1)-O(3)              | 1.746(4)   |
| Cu(1)-O(4)#1        | 1.920(4)   | Mo(1)-O(4)              | 1.785(4)   |
| Cu(1)-N(1)#2        | 2.017(5)   | Mo(1)-O(5)              | 1.761(5)   |

|                         |            |                   |           |
|-------------------------|------------|-------------------|-----------|
| Cu(1)-N(6)              | 2.024(5)   | N(6)-Cu(1)-O(2)   | 96.35(19) |
| O(4)#1-Cu(1)-O(1)       | 171.63(19) | N(1)#2-Cu(1)-N(6) | 162.2(2)  |
| <b>5</b> <sup>[e]</sup> |            |                   |           |
| Mo(1)-N(2)              | 2.359(3)   | Mo(3)-O(3)        | 1.993(3)  |
| Mo(1)-O(1)              | 1.690(3)   | Mo(3)-O(7)        | 2.203(3)  |
| Mo(1)-O(2)              | 1.993(3)   | Mo(3)-O(8)        | 1.717(3)  |
| Mo(1)-O(3)              | 1.862(3)   | Mo(3)-O(9)        | 1.8878(4) |
| Mo(1)-O(4)              | 1.754(3)   | Mo(3)-O(10)       | 2.324(3)  |
| Mo(1)-O(7)              | 2.230(3)   | Mo(3)-O(11)       | 1.695(3)  |
| Mo(2)-N(1)              | 2.582      | Mo(2)-O(7)        | 1.879(3)  |
| Mo(2)-O(5)              | 1.708(3)   | Mo(2)-O(2)        | 2.224(3)  |
| Mo(2)-O(6)              | 1.708(3)   | Mo(2)-O(2)#4      | 1.987(3)  |
| Co(1)-N(6)#2            | 2.159(3)   | Co(1)-O(4)        | 2.083(3)  |
| Co(1)-N(5)#4            | 2.200(3)   |                   |           |

Symmetry codes: [a] #1 x, y-1, z; #2 -x+1, -y+1, -z; #3 -x+1, -y+1, -z+1. [b] #1 -x+1, -y, -z+2. [c] #2 x-1, -y+3/2, z-1/2. [d] #1 x, -y+1/2, z-1/2; #2 x+1, -y+1/2, z+1/2. [e] #2 x+1, y, z; #4 -x+1, -y+1, -z.

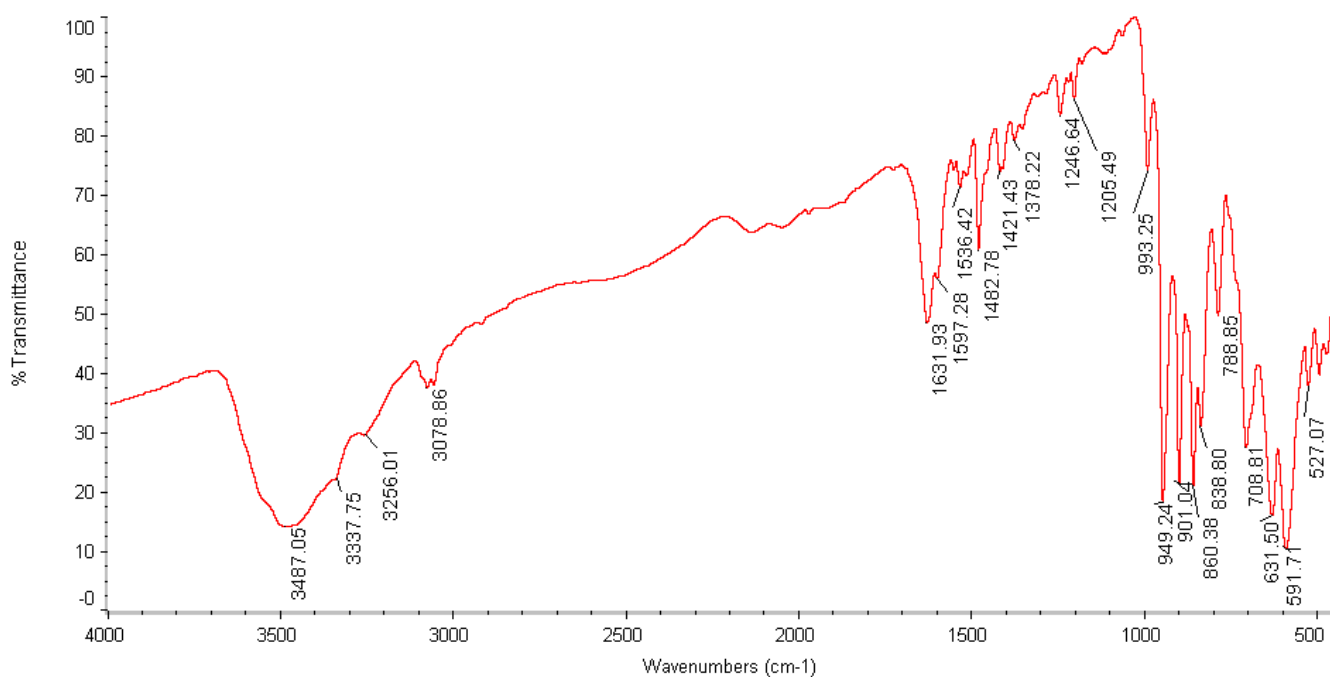

**Figure S1a.** IR spectrum of  $[\text{Mo}_8\text{O}_{26}\text{Cu}_2(4\text{-abpt})_2]_n \cdot 4n\text{H}_2\text{O}$  (**1**)

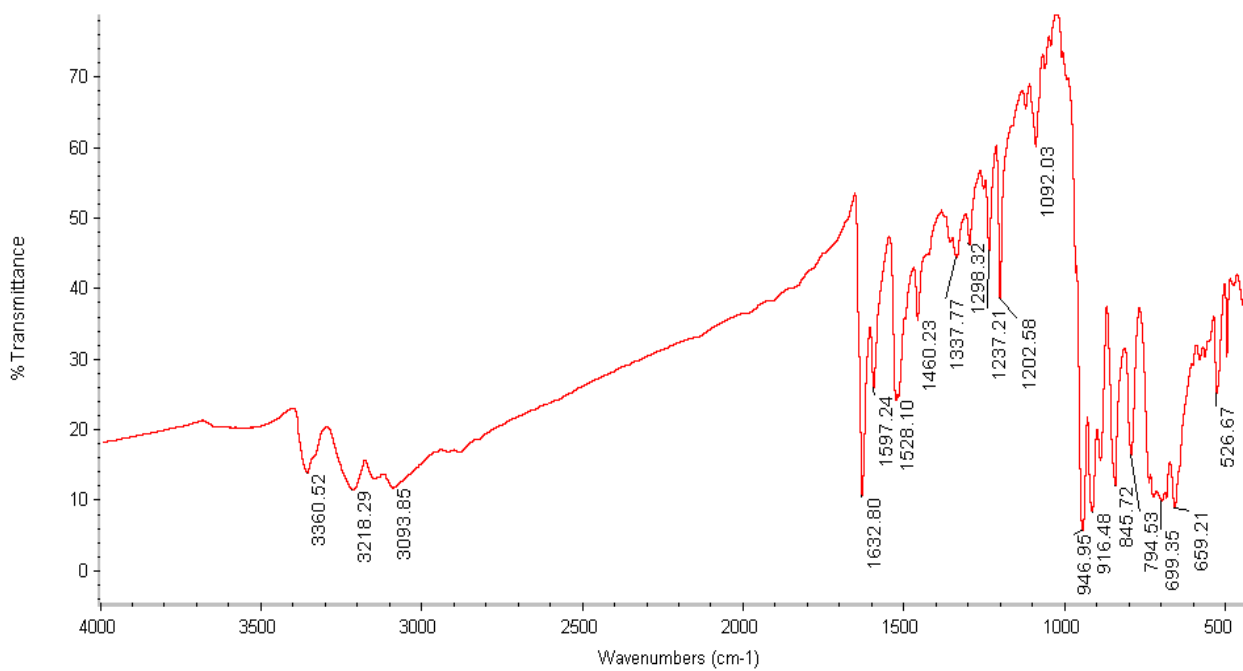

**Figure S1b.** IR spectrum of  $(4\text{-H}_2\text{abpt})_2[\text{Mo}_8\text{O}_{26}]$  (**2**)

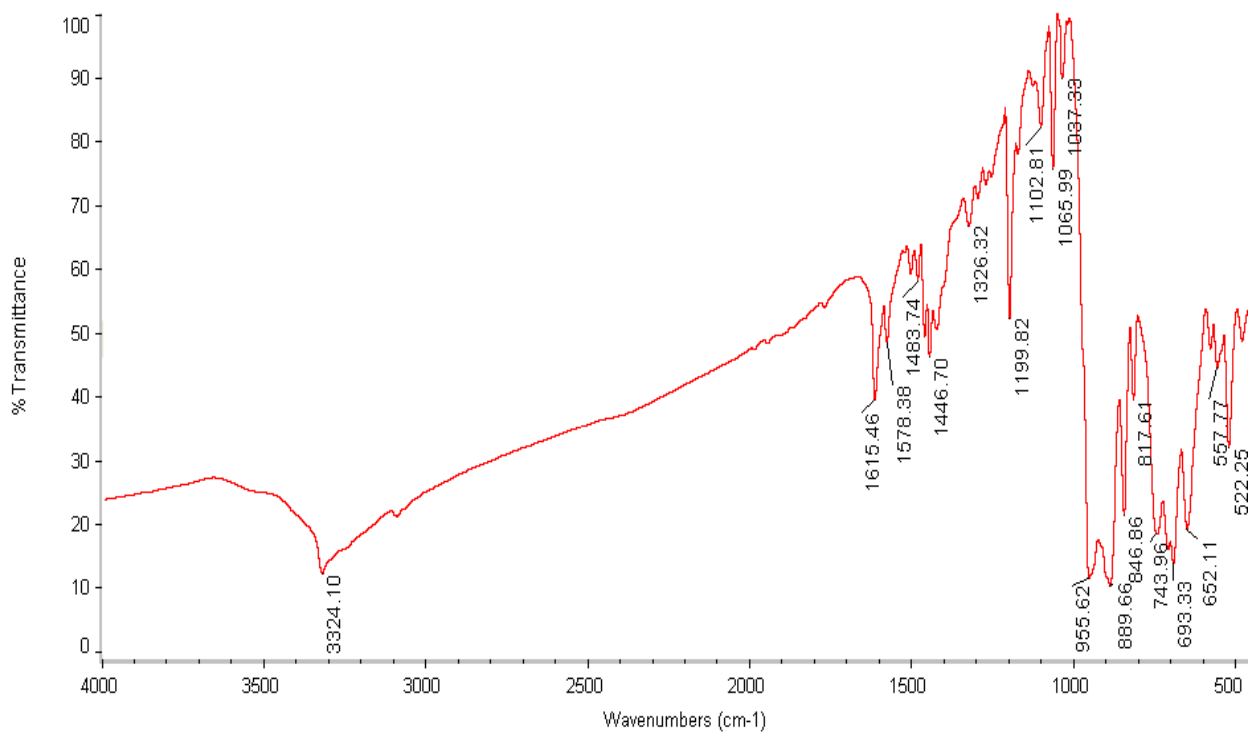

**Figure S1c.** IR spectrum of  $[\text{Mo}_8\text{O}_{26}\text{Cu}_2(3\text{-abpt})_2(\text{H}_2\text{O})_2]_n$  (**3**)

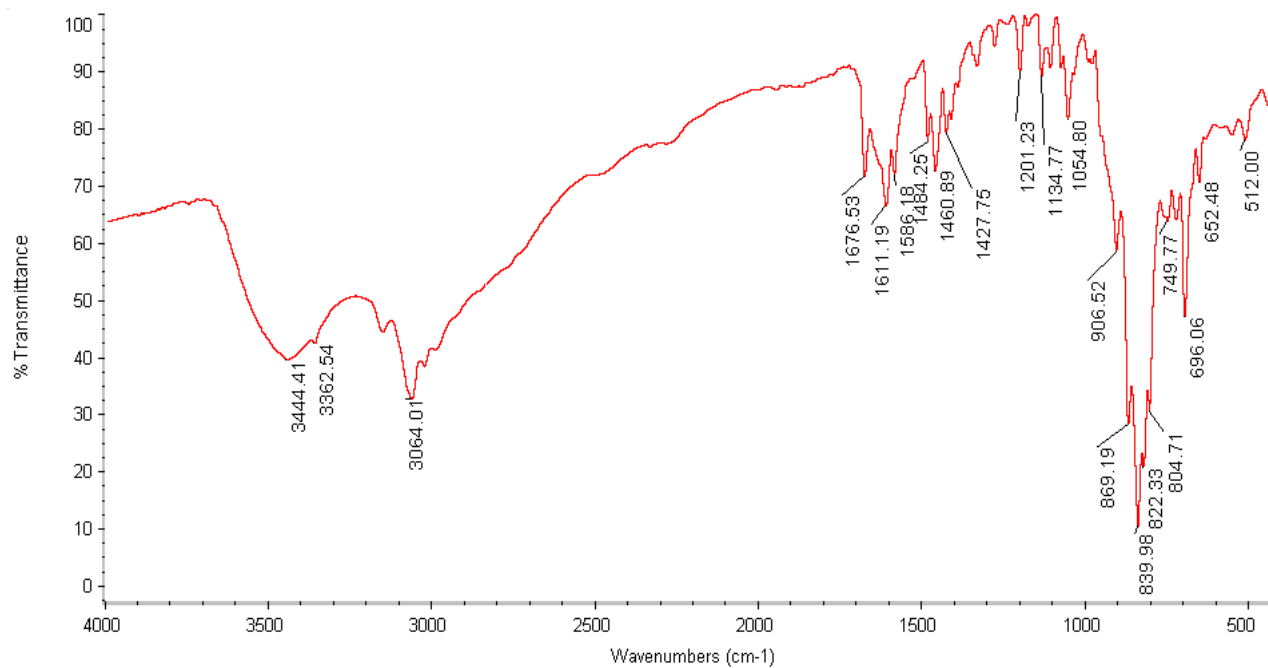

**Figure S1d.** IR spectrum of  $[\text{MoO}_4\text{Cu}(3\text{-abpt})(\text{H}_2\text{O})]_n$  (4)

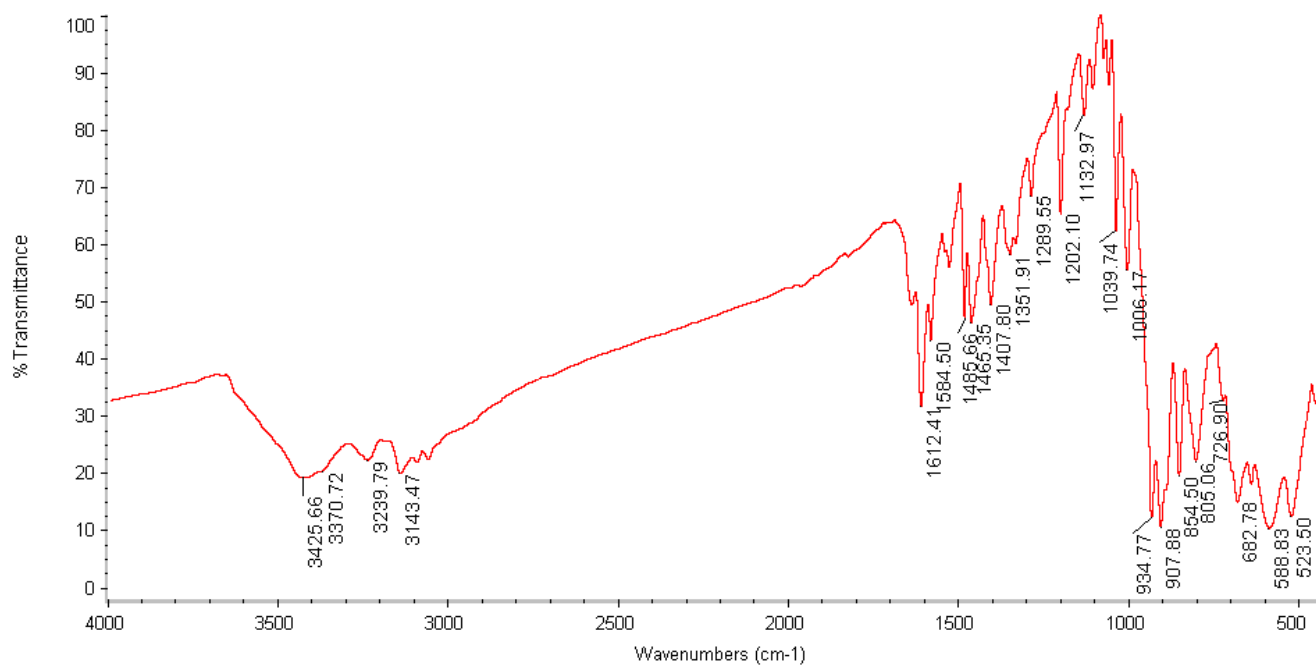

**Figure S1e.** IR spectrum of  $[\text{Mo}_6\text{O}_{19}\text{Co}(3\text{-abpt})_2]_n \cdot 4n\text{H}_2\text{O}$  (5)

**Figure S1.** Infrared spectra of complexes 1-5

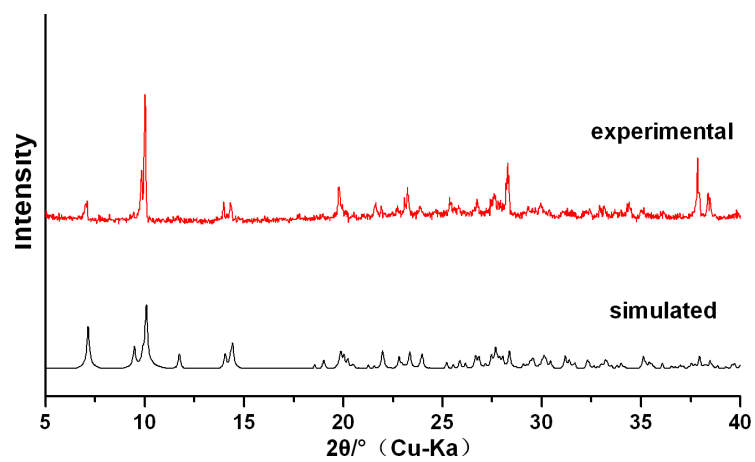

Figure S2a. The PXR D pattern of 1.

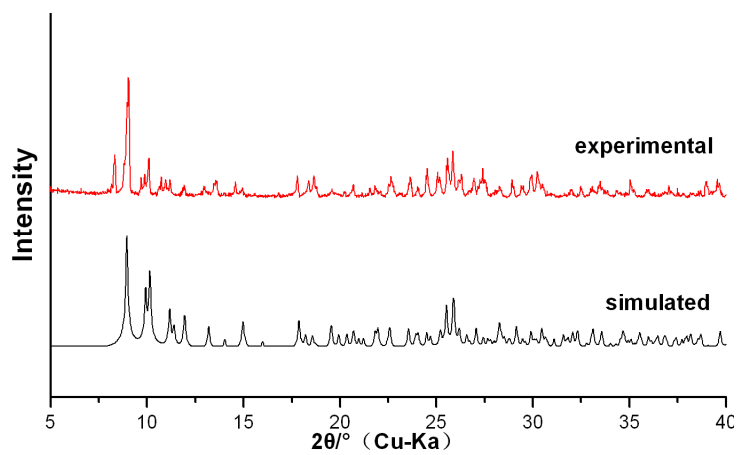

Figure S2b. The PXR D pattern of 2.

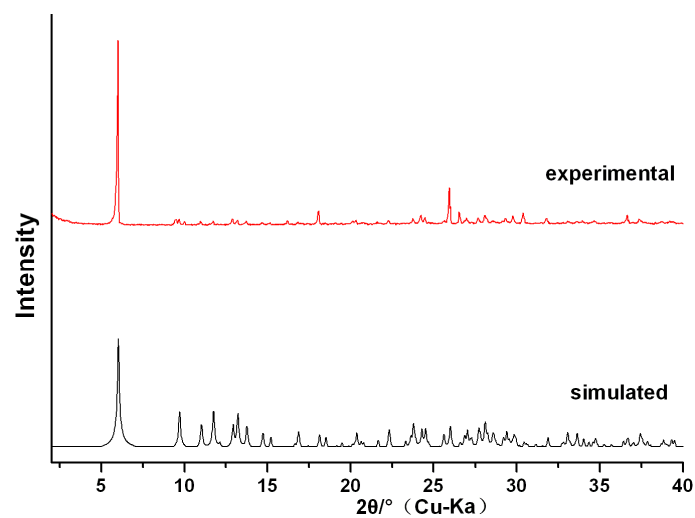

Figure S2c. The PXR D pattern of 3.

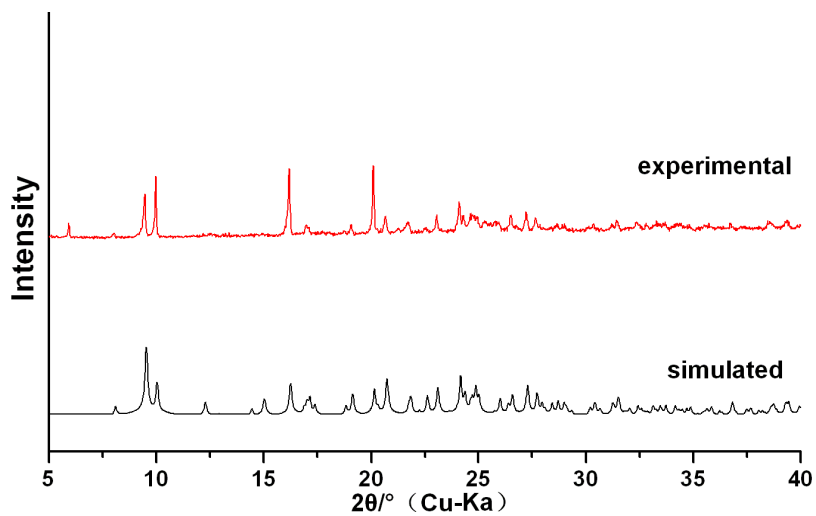

Figure S2d. The PXRd pattern of 4.

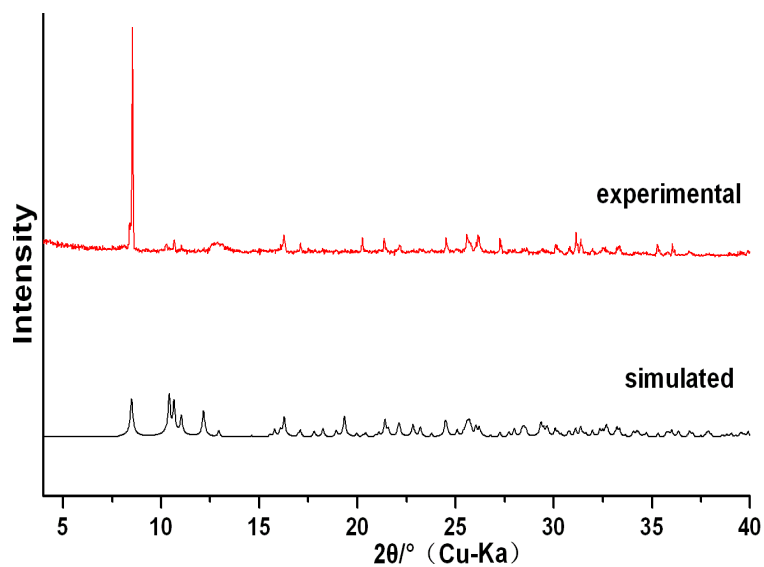

Figure S2e. The PXRd pattern of 5.

**Figure S2.** The measured and simulated powder X-ray diffraction patterns of 1–5  
(The compound 2 and 4 seem to contain a crystalline impurity. We have not obtained more satisfying PXRd)

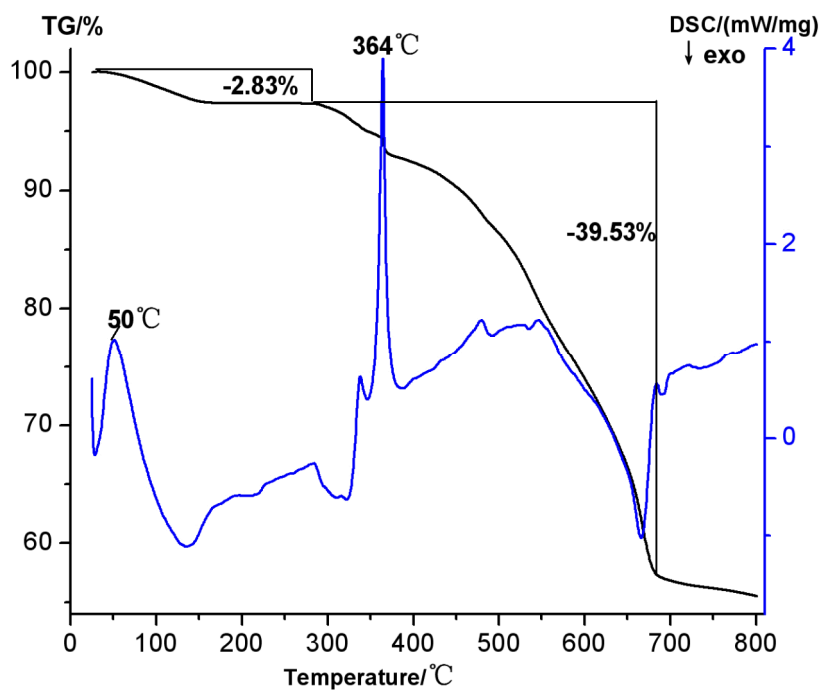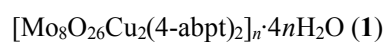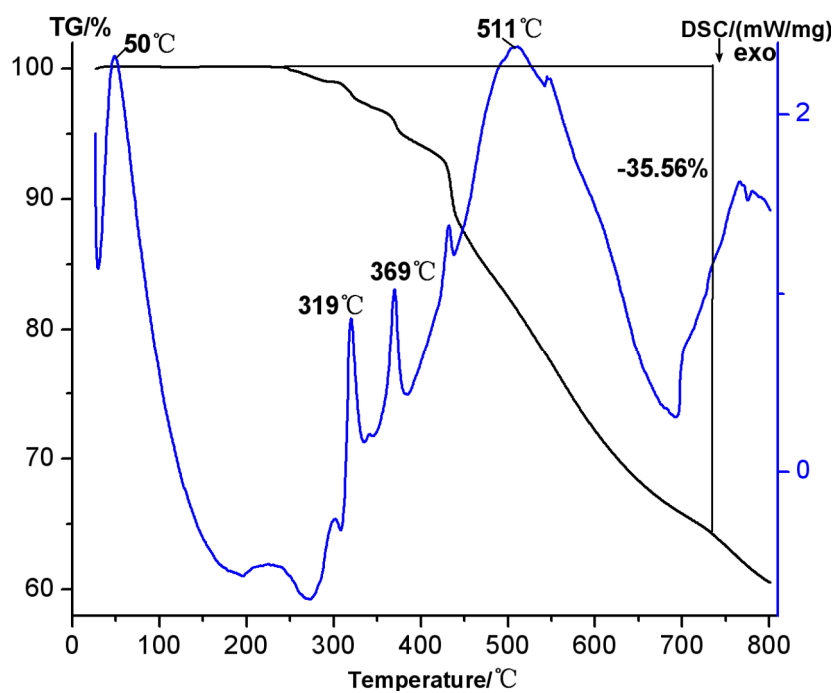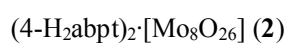



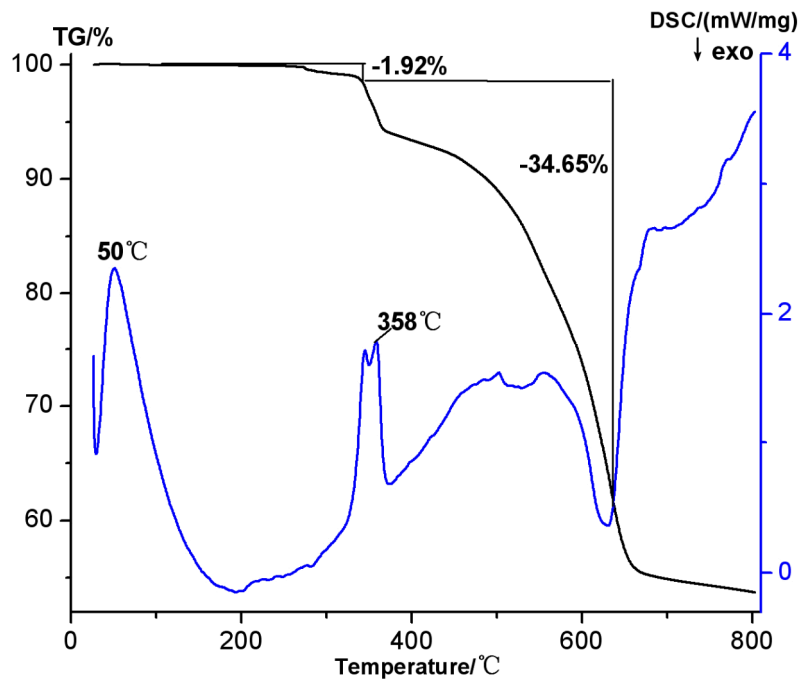

$[\text{Mo}_8\text{O}_{26}\text{Cu}_2(3\text{-abpt})_2(\text{H}_2\text{O})_2]_n$  (3)

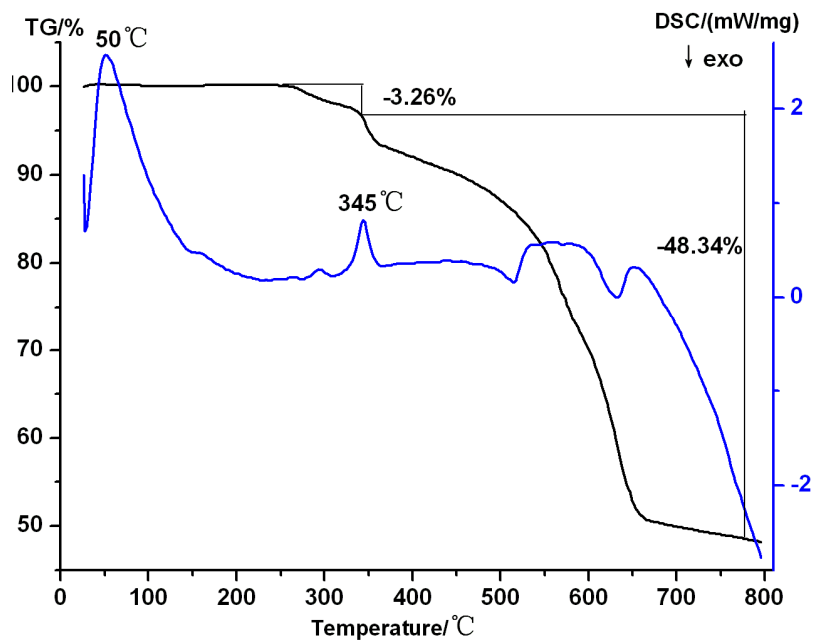

$[\text{MoO}_4\text{Cu}(3\text{-abpt})(\text{H}_2\text{O})]_n$  (4)

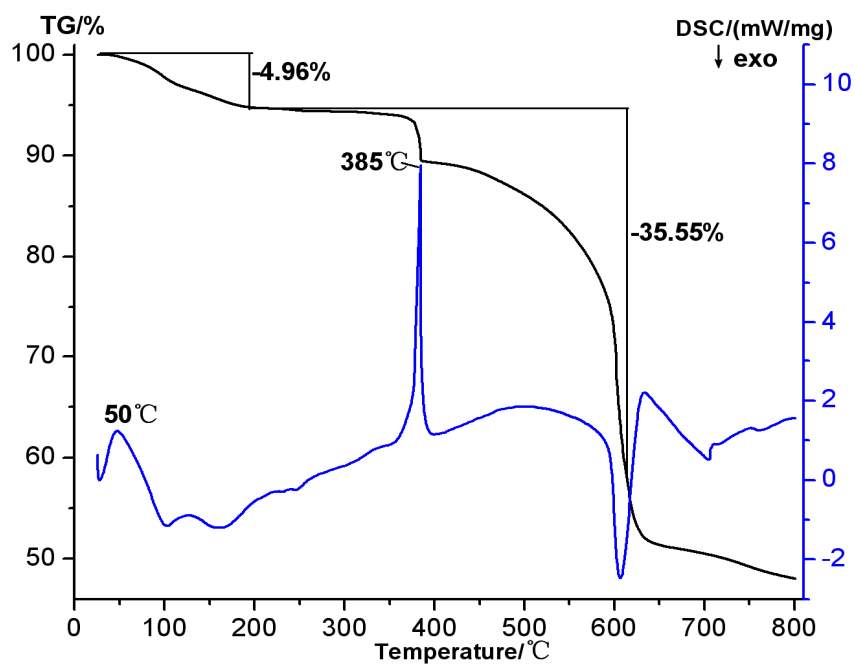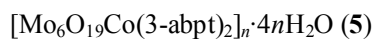

Figure S3. Thermal analysis curves of 1-5

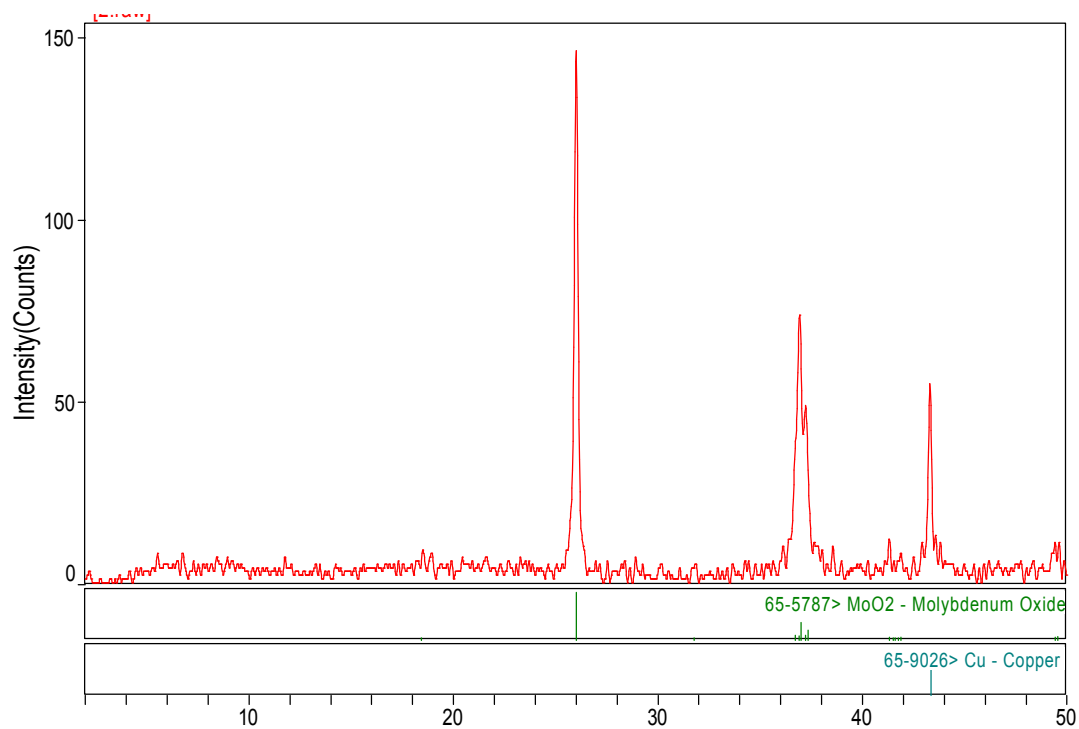

Figure S4a. The residue PXRD pattern of 1 (a mixture of MoO<sub>2</sub> and Cu)

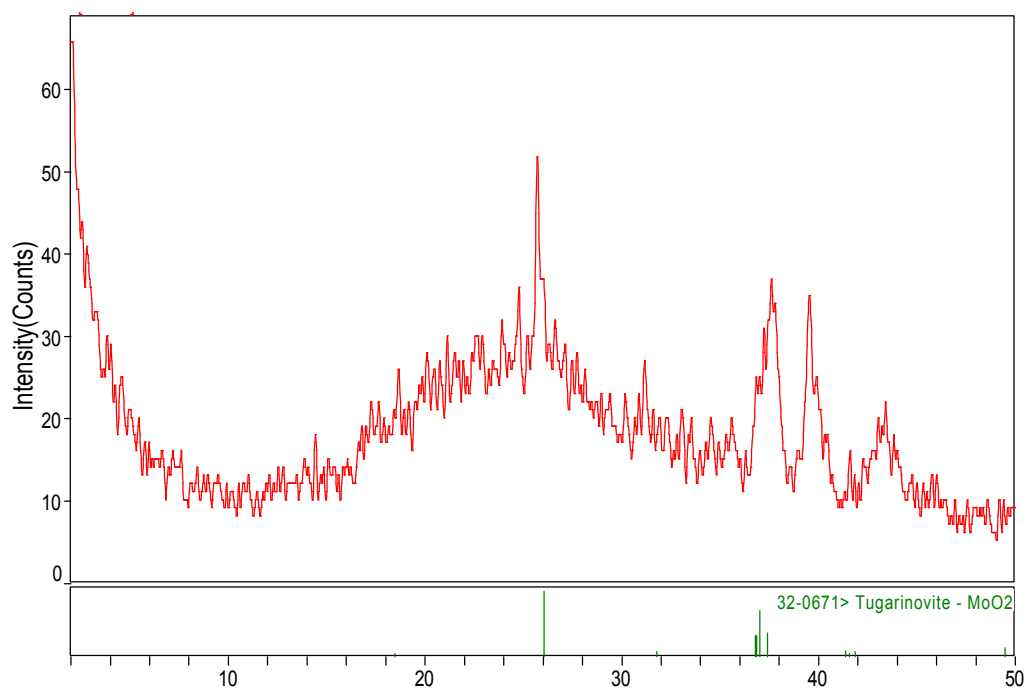

**Figure S4b.** The residue PXR D pattern of **2** (MoO<sub>2</sub>)

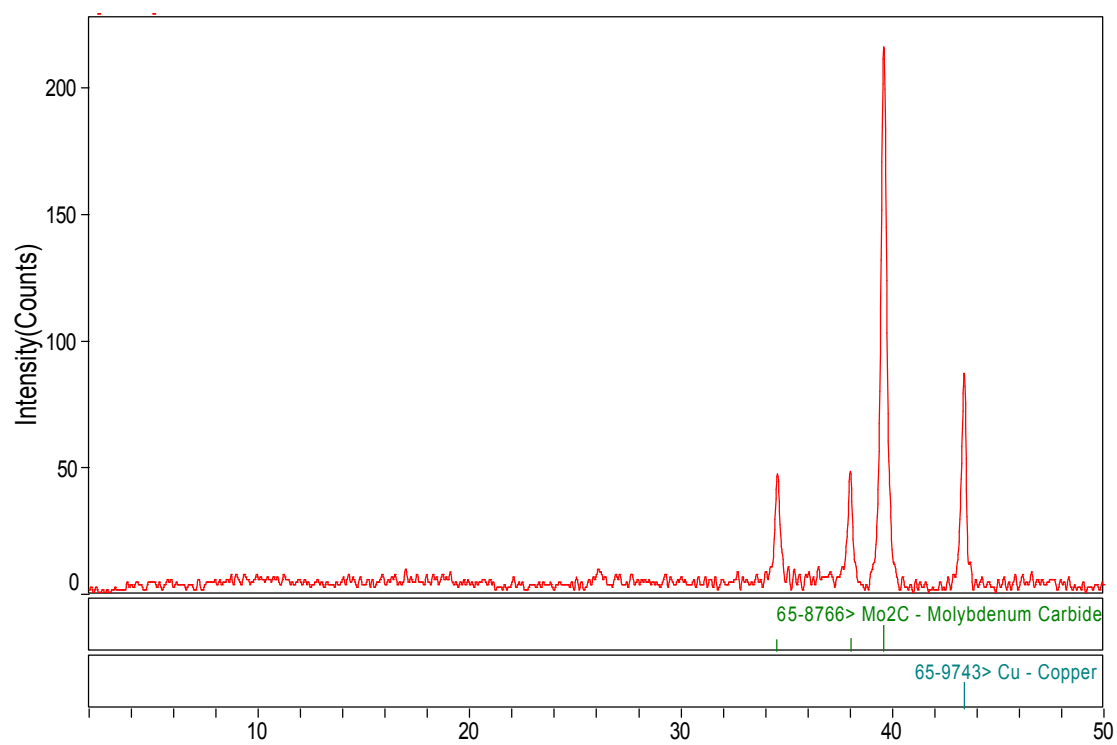

**Figure S4c.** The residue PXRD pattern of **3** (a mixture of Mo<sub>2</sub>C and Cu)

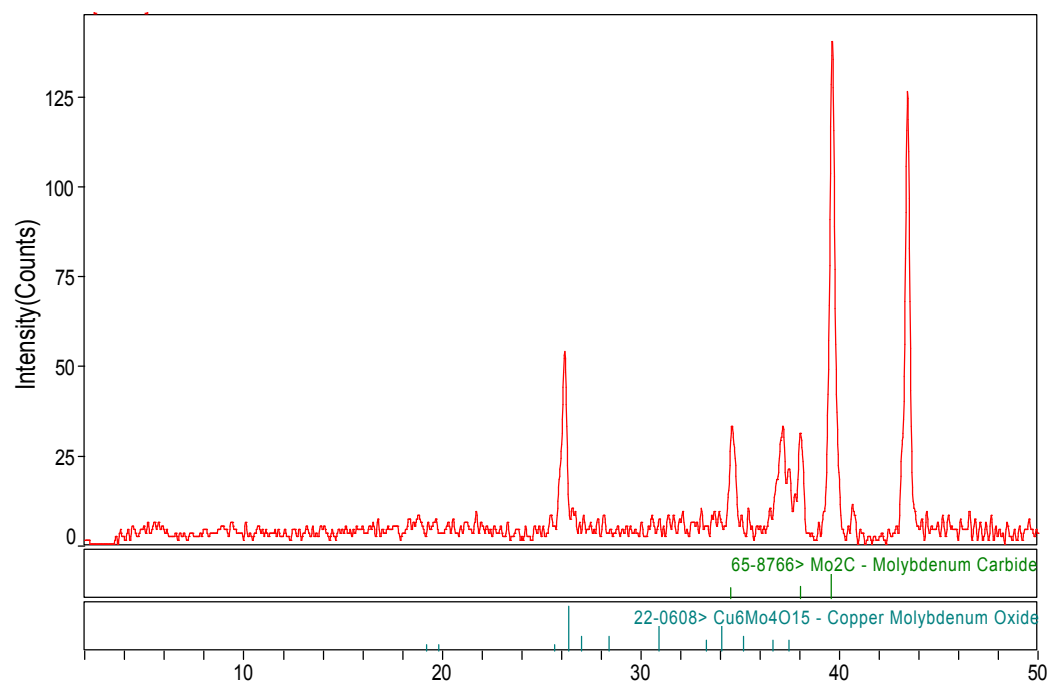

**Figure S4d.** The residue PXRD pattern of **4** (new compound CuMoO<sub>4</sub>)

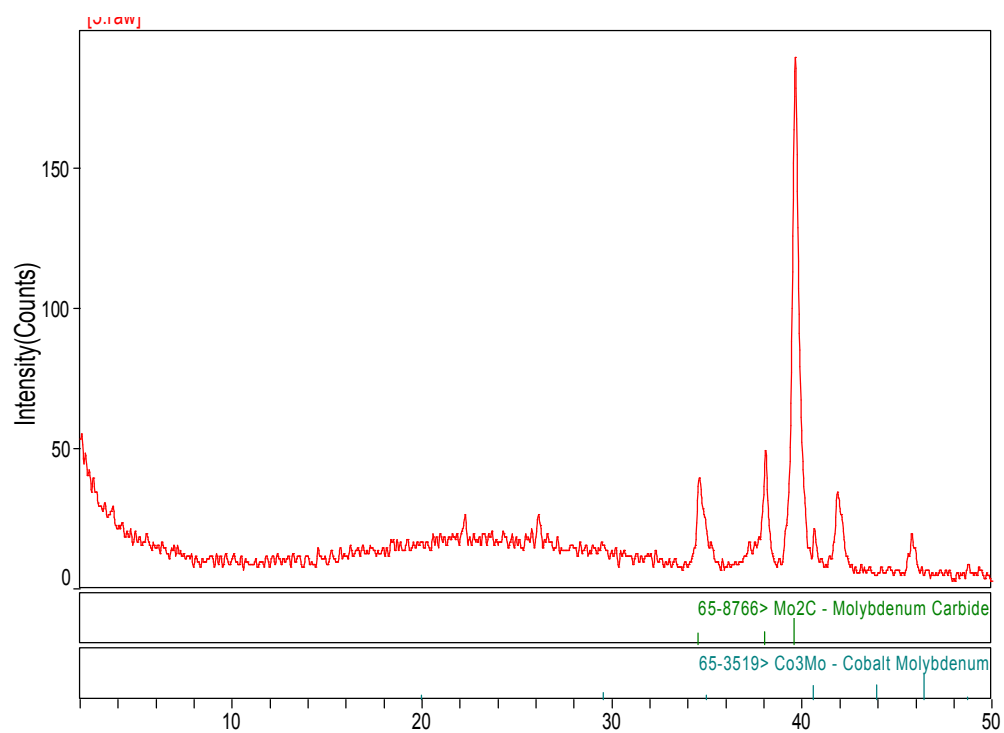

**Figure S4e.** The residue PXRD pattern of **5** (a mixture of Mo<sub>2</sub>C and Co<sub>3</sub>Mo)

**Figure S4.** The powder X-ray diffraction patterns of TG residues for **1–5**
